# Supplementary material
Source: PubMed Central journal article supplement (PMC6300162)
Supplement: NIHMS981808-supplement-1.pdf [file NIHMS981808-supplement-1.pdf]

**Supplemental Figure 1. Study Design**

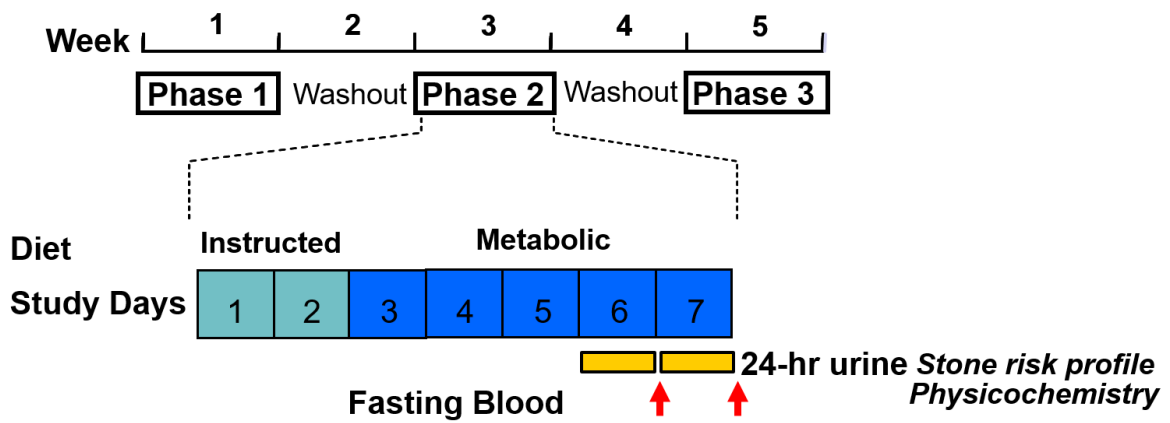

**Meds: 3 tablets twice daily with breakfast and dinner x 7 days**

- Citric Acid 10 mEq 3 tabs twice daily
- Placebo: 3 tabs twice daily
- Potassium Citrate: 10 mEq 2 tabs + placebo 1 tab twice daily
